# Supplementary material
Source: Royal Society of Chemistry journal article supplement (doi:10.1039/d6nj01297c)
Supplement: d6nj01297c1.pdf [file d6nj01297c1.pdf]

## Supporting information

### **Hippuric acid–appended aminothiazole derivatives as ion-responsive metallogelators for visual detection of Ce(III)**

Priyanka Yadav<sup>a\*</sup> Mahammdmahir M. Saiyed<sup>a</sup> and Vinay S. Sharma<sup>b</sup>

<sup>a</sup>Department of Chemistry, Sardar Patel University, Vallabh Vidyanagar, Anand, 388120 Gujarat, India.

<sup>b</sup>Department of Chemistry, Parul institute of applied science, research and development cell, Parul university, Vadodara, Gujarat, 391760, India.

#### **Materials.**

All reagent grade materials were purchased from Sigma-Aldrich and used as received. The solvents used for the preparation of gels were purified, dried and distilled as required.

#### **Instrumentation.**

**FTIR spectroscopy:** FTIR Spectra were recorded on a Bruker –ALPHA II, FTIR instrument. Solid samples were recorded as an intimate mixture with powdered KBr.

**NMR spectroscopy:** The <sup>1</sup>H- NMR spectra were measured by using a Bruker AVANCE, 400MHz for <sup>1</sup>H-NMR with TMS as internal standard and CDCl<sub>3</sub>/DMSO as solvent.

**Scanning Electron Microscopic Study:** Morphologies of all reported gel materials were investigated using scanning electron microscopy (SEM). For SEM study, solution of a gelator is placed on a SEM sample holder and allowed to form gel, which was then dried under vacuum to give xerogel, and then the micrographs were taken in a SEM apparatus (FEI Nova NanoSEM 450 microscope)

**Rheometer.** The rheological experiments were carried out with a Anton paar - MCR102 Rheometer with a parallel plate configuration.

**X-ray Photoelectron Spectroscopy (XPS).** The XPS study were carried out with Thermo Scientific K-Alpha class or equivalent.

**Table S1. Comparison of Ce<sup>3+</sup> detection methods**

| <b>Method</b>                         | <b>Detection Principle</b>                | <b>Detection Limit (LOD)</b> | <b>Linear Range</b> | <b>Practicality/ Application</b> | <b>Trade-off Highlighted</b>                              |
|---------------------------------------|-------------------------------------------|------------------------------|---------------------|----------------------------------|-----------------------------------------------------------|
| ICP-MS <sup>1</sup>                   | Mass spectrometry of ions                 |                              | Wide (ppb–ppm)      | Highly sensitive, precise        | Requires expensive instrumentation, trained personnel     |
| UV-Vis Spectroscopy <sup>2</sup>      | Absorbance of Ce <sup>3+</sup> complexes  | ~0.1–1 ppm                   | ppm range           | Moderate sensitivity, lab-based  | Needs sample preparation, less portable                   |
| Electrochemical Sensors <sup>3</sup>  | Redox response of Ce <sup>3+</sup>        | ~0.01–0.1 ppm                | ppm range           | Sensitive, portable options      | Requires calibration, interference possible               |
| Fluorescence Probes <sup>4</sup>      | Quenching/enhancement by Ce <sup>3+</sup> | ~0.1 ppm                     | ppm range           | Sensitive, selective             | Probe synthesis, stability issues                         |
| Thiazole-based Metallogel (this work) | Visual gel formation (qualitative)        | ~1000 ppm                    | Not established     | Rapid, on-site, simple screening | Low sensitivity; suitable for highly contaminated samples |

**Table S2- <sup>1</sup>H and <sup>13</sup>C NMR chemical shift changes of ligand 2a upon complexation with Ce<sup>3+</sup> ion.**

| <b>Proton/Carbon Type</b>                          | <b>Free Ligand (ppm)</b> | <b>Metal Complex (ppm)</b> | <b>Typical Shift Direction</b> | <b>Reason</b>                                  |
|----------------------------------------------------|--------------------------|----------------------------|--------------------------------|------------------------------------------------|
| Methyl protons (C-4)                               | 2.00                     | 2.05                       | Slight downfield               | Inductive deshielding, minor effect.           |
| CH <sub>2</sub> (Near carboxylic group)            | 3.90                     | 4.14                       | Downfield                      | deshielding and line broadening                |
| NH of amide group                                  | 8.81                     | 9.02                       | Downfield                      | deshielding and line broadening                |
| -CH of thiozole ring                               | 6.06                     | 6.10                       | Slight downfield               | deshielding, minor effect.                     |
| -CH benzene ring near to amide group               | 7.84                     | 7.91                       | Slight downfield               | deshielding, minor effect.                     |
| Carbon of carboxylic group (C=O)                   | 171.46                   | 172.49                     | Downfield                      | Direct coordination site →strong deshielding.  |
| carbon attached to NH <sub>2</sub> and ring N-atom | 168.33                   | 168.77                     | Slight downfield               | π-electron withdrawal by metal center.         |
| Carbon of amide group attached to aromatic ring    | 166.09                   | 167.01                     | Downfield                      | Direct coordination site →strong deshielding.  |
| Carbon attached to ring sulphur atome (C-S)        | 100.10                   | 101.156                    | Downfield                      | site for hydrogen bonding →strong deshielding. |

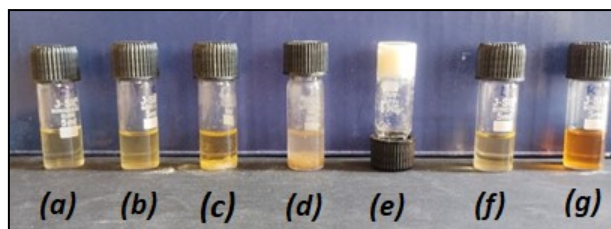

**Fig.S1** photograph of ion selective response of ligand 2a with (a)  $Zn^{2+}$ , (b)  $Cd^{2+}$ , (c)  $Pb^{2+}$ , (d)  $Ag^+$ , (e)  $Ce^{3+}$ , (f)  $Li^+$ , and (g)  $K^+$

### Analytical data

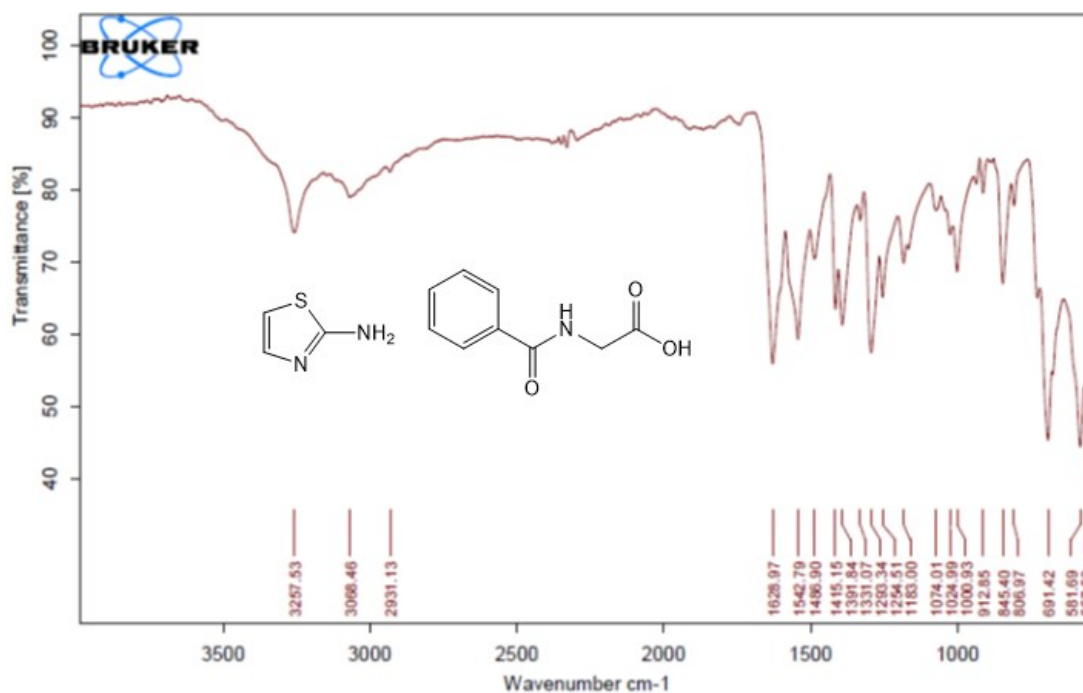

**Fig.S2** IR spectra of compound-1a.

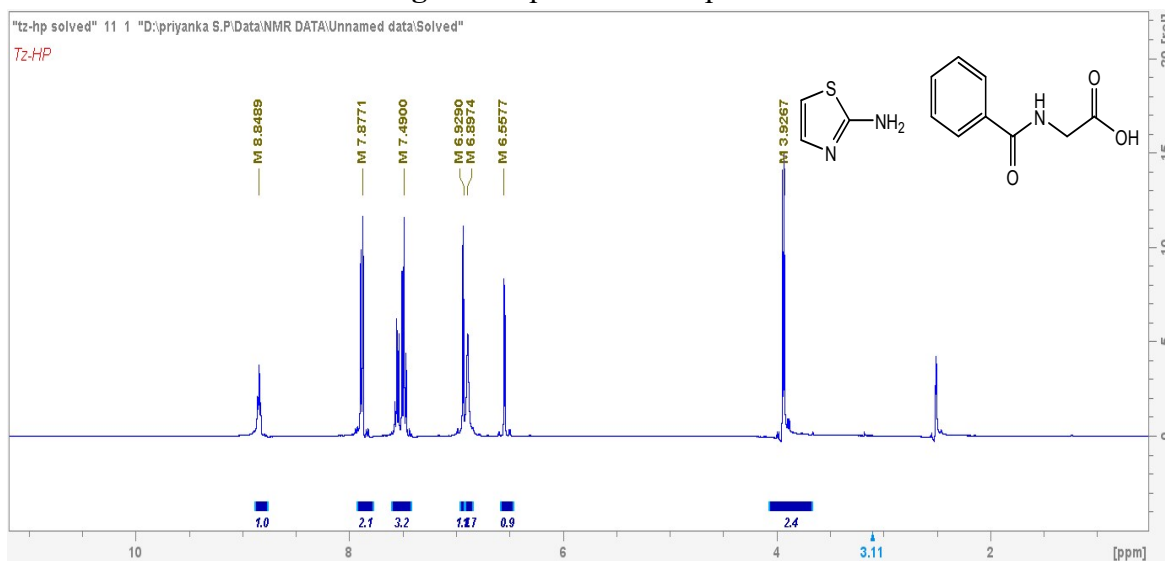

**Fig.S3**  $^1H$ NMR spectra of compound-1a.

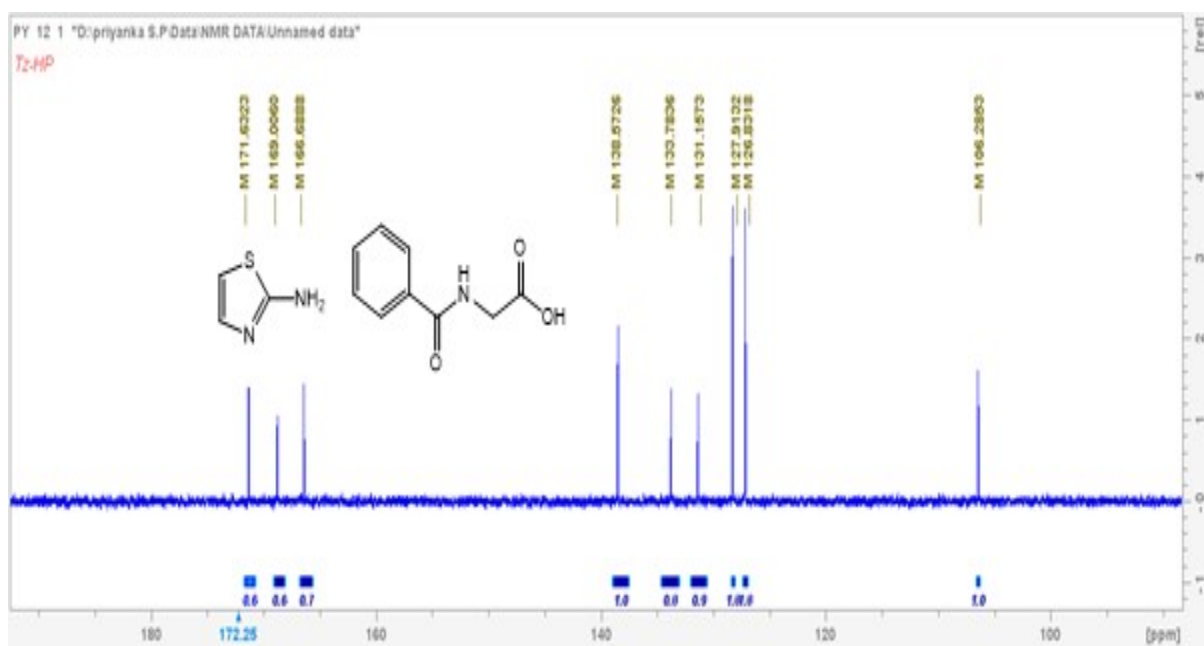

Fig.S4 <sup>13</sup>CNMR spectra of compound-1a.

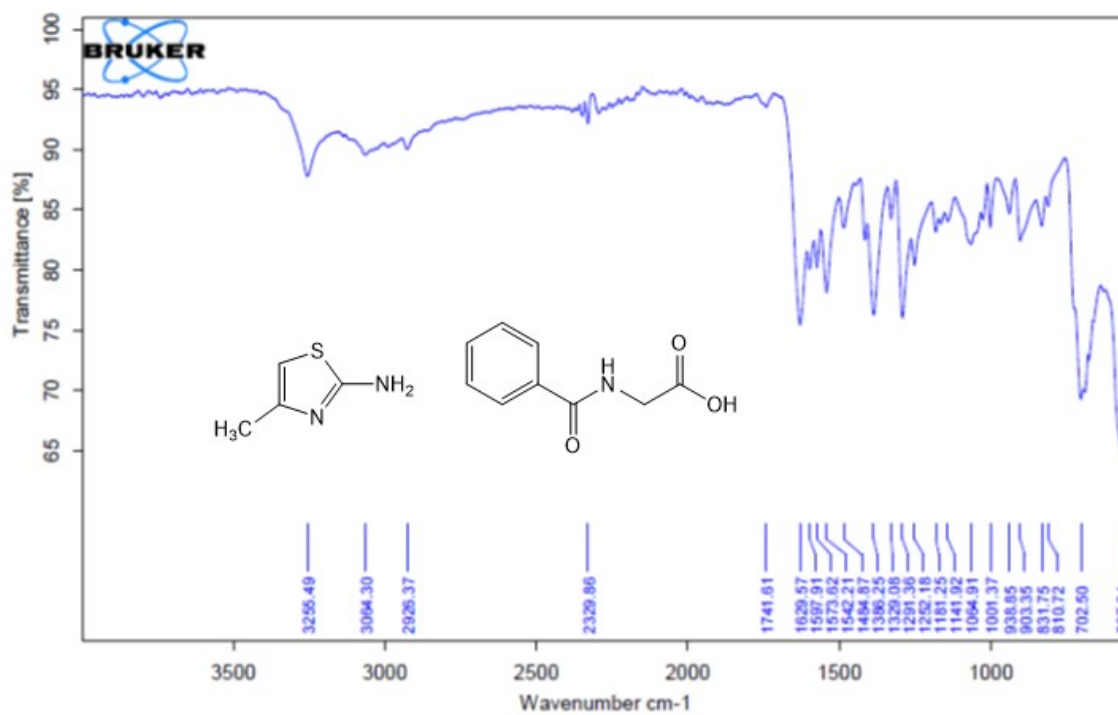

Fig.S5 IR spectra of compound-2a.

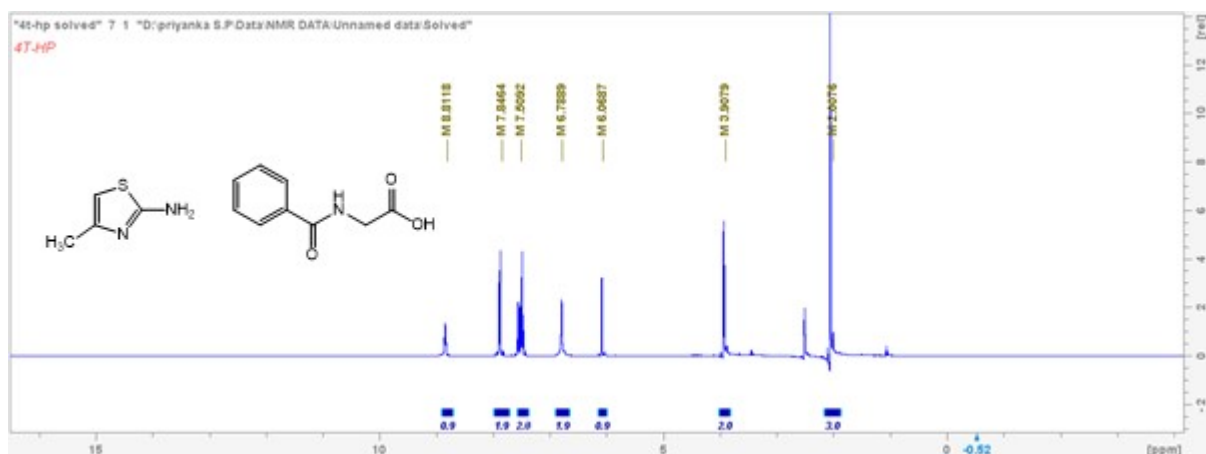

Fig.S6 <sup>1</sup>H NMR spectra of compound-2a.

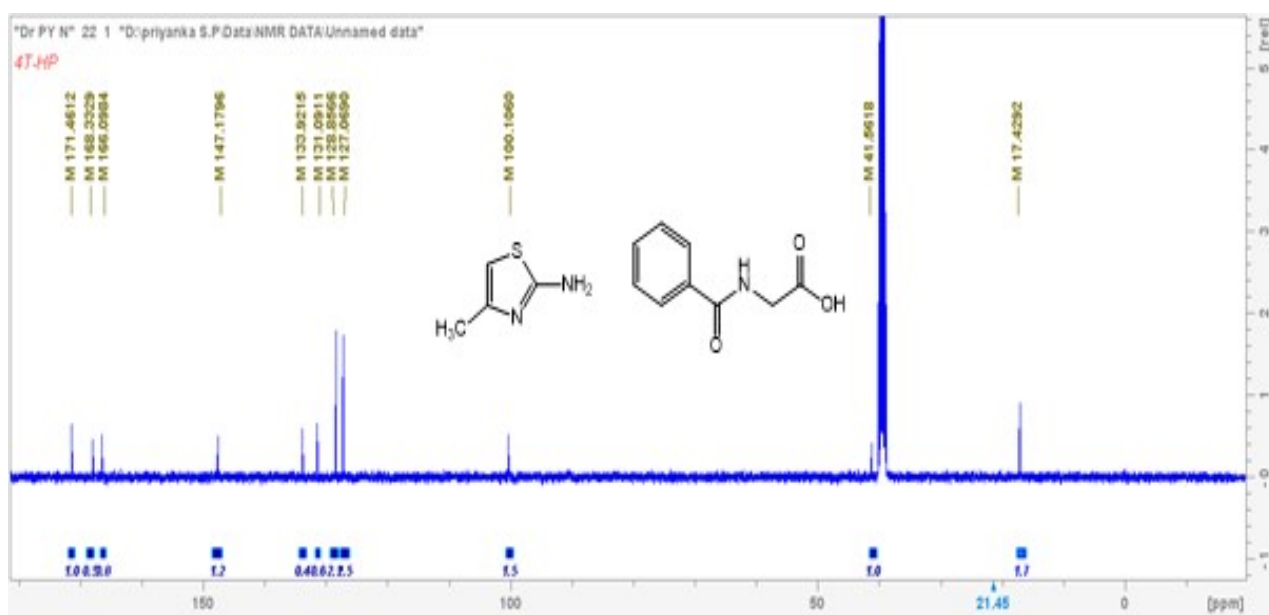

Fig.S7 <sup>13</sup>C NMR spectra of compound-2a.

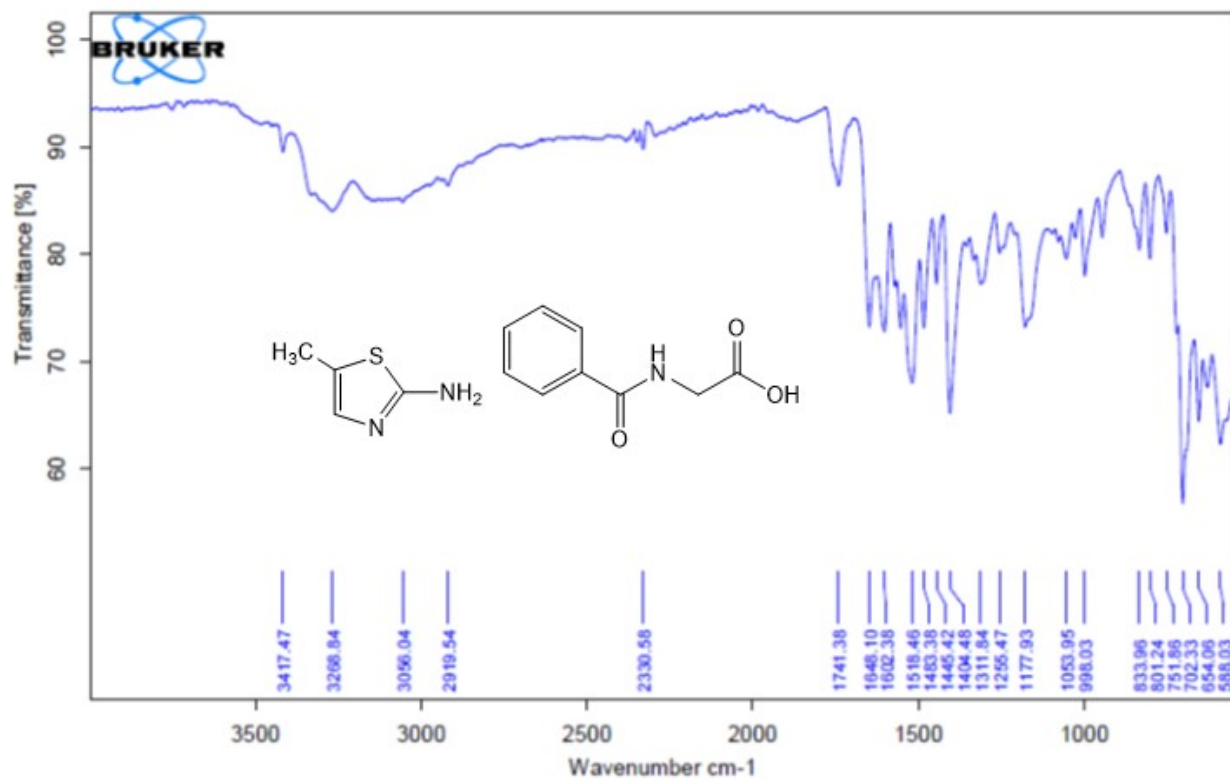

Fig.S8 IR spectra of compound-3a

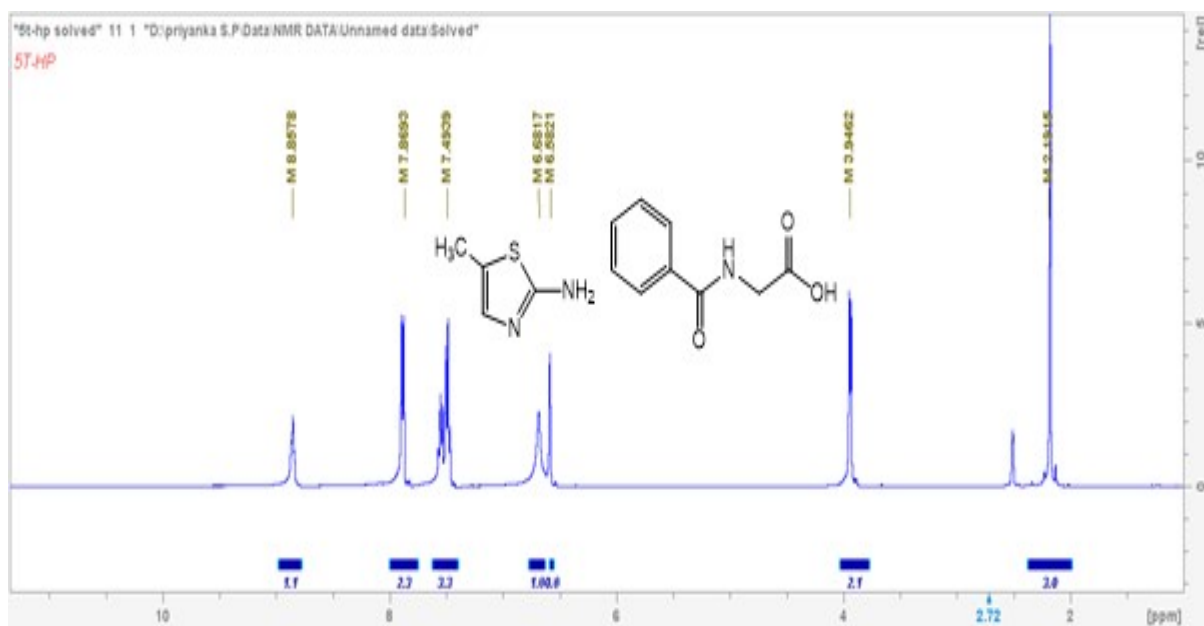

Fig.S9 <sup>1</sup>H NMR spectra of compound-3a.

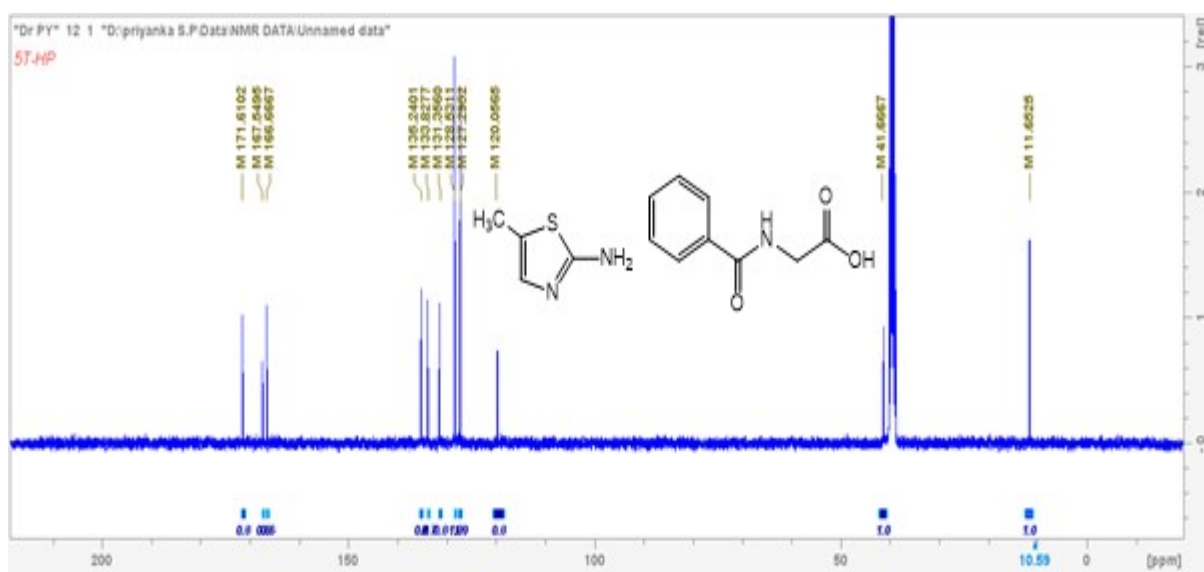

Fig.S10 <sup>13</sup>C NMR spectra of compound-3a.

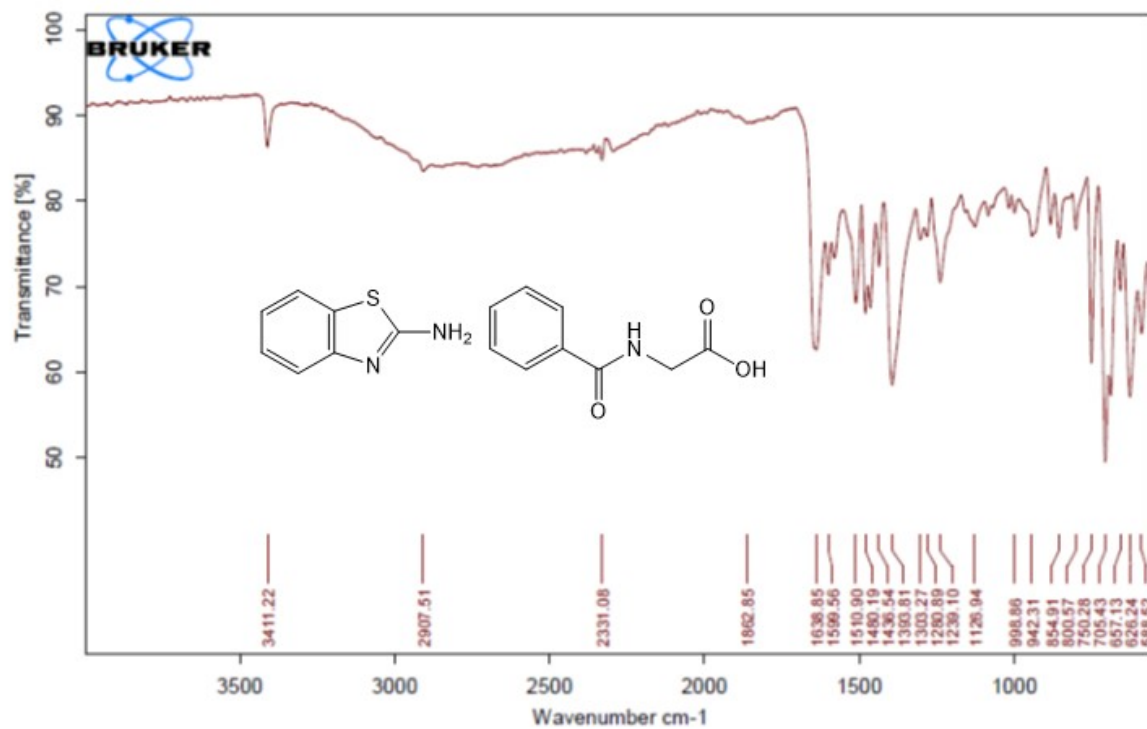

Fig.S11 IR spectra of compound-4a

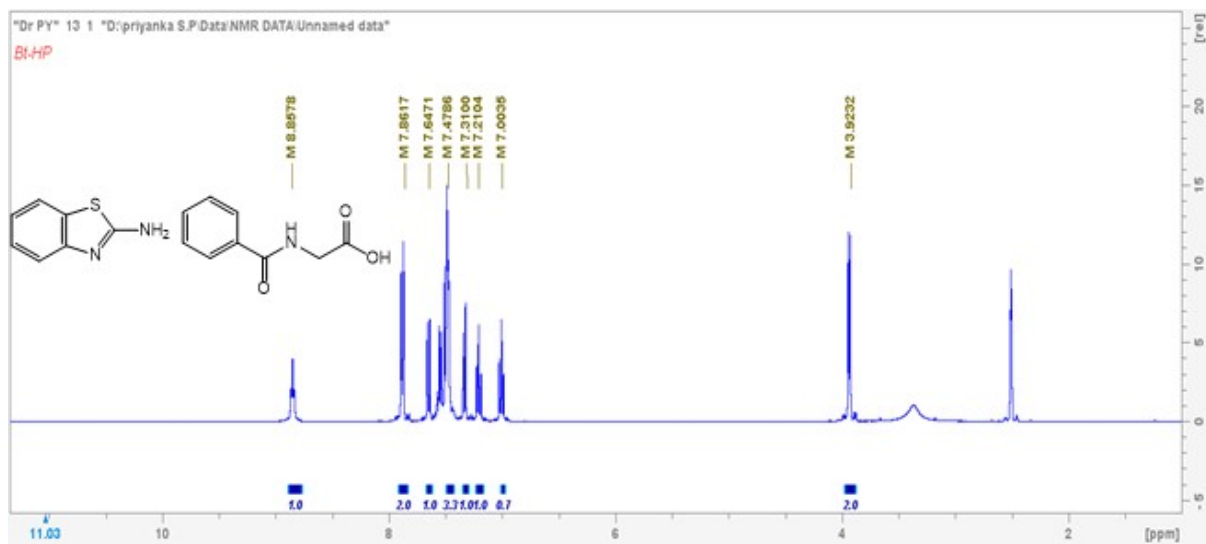

Fig.S12 <sup>1</sup>H NMR spectra of compound-4a.

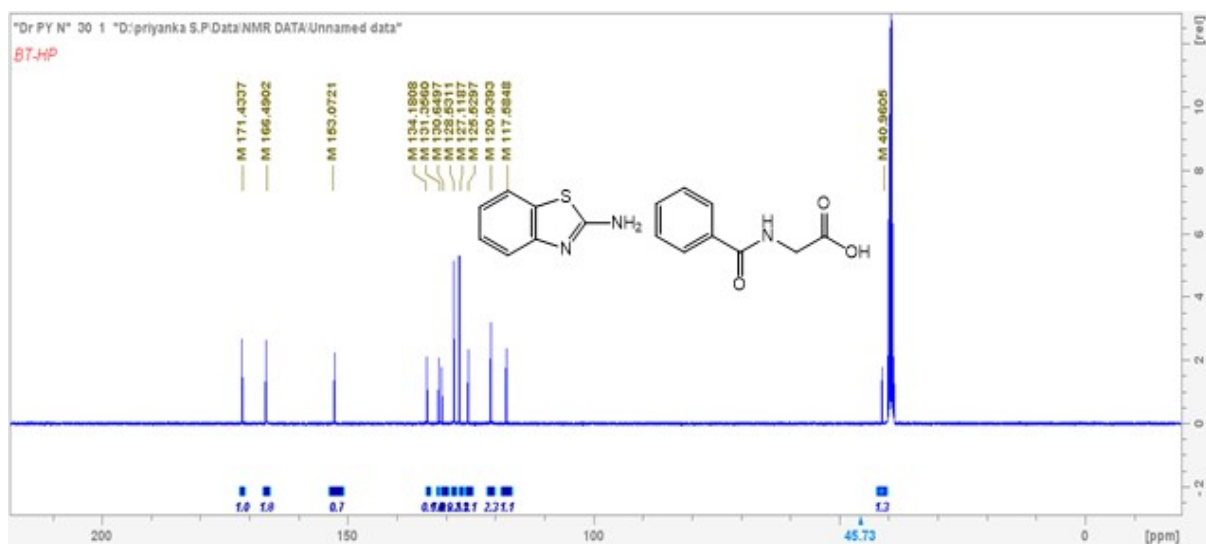

Fig.S13  $^{13}\text{C}$  NMR spectra of compound-4a.

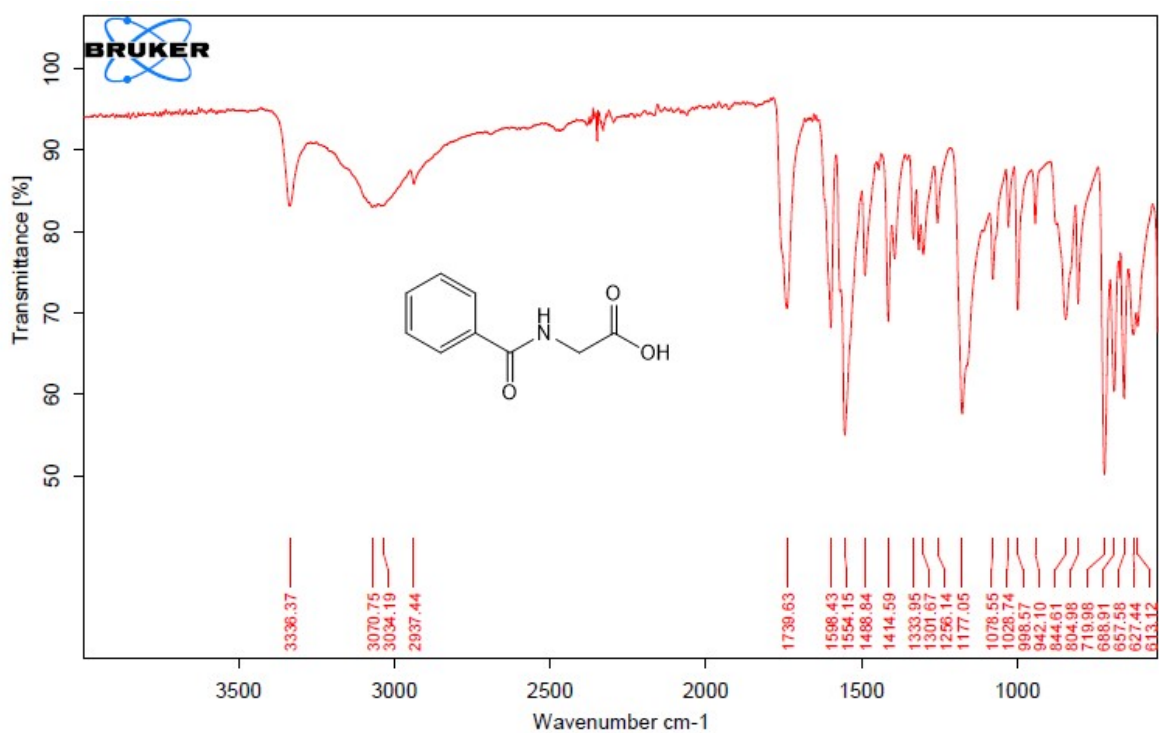

Fig.S14 IR spectra of hippuric acid compound-a.

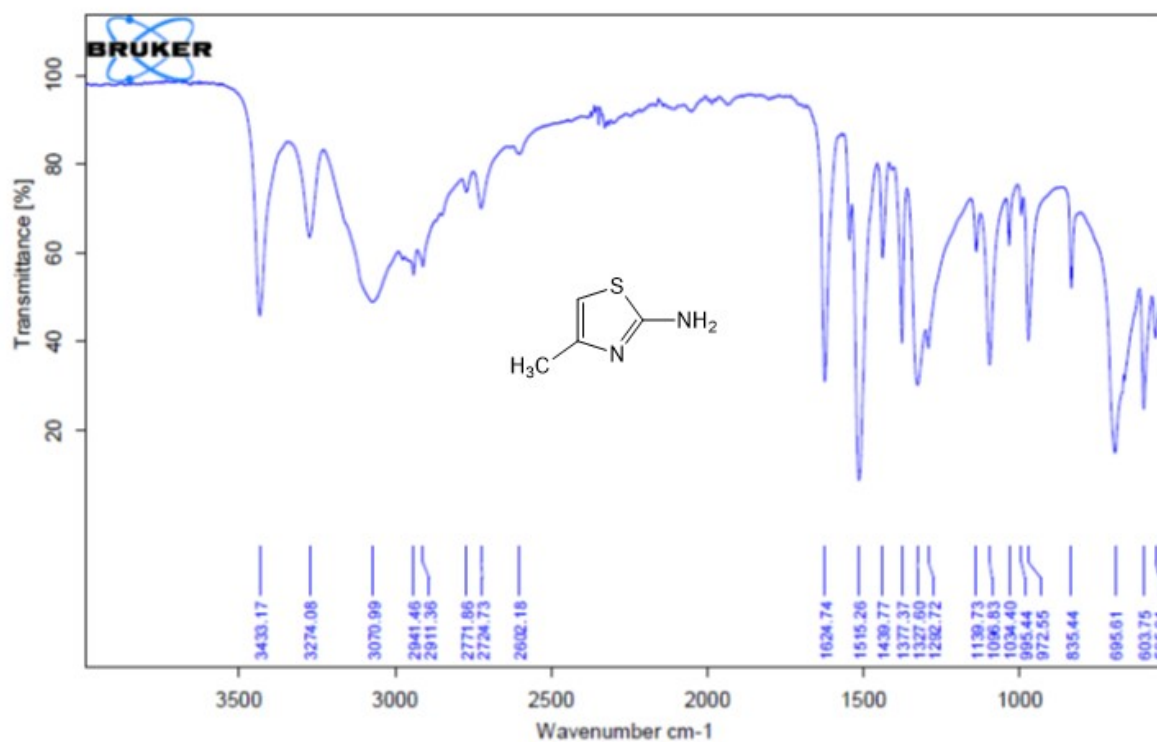

Fig.S15 IR spectra of 2-amino-4-methylthiazole compound-2.

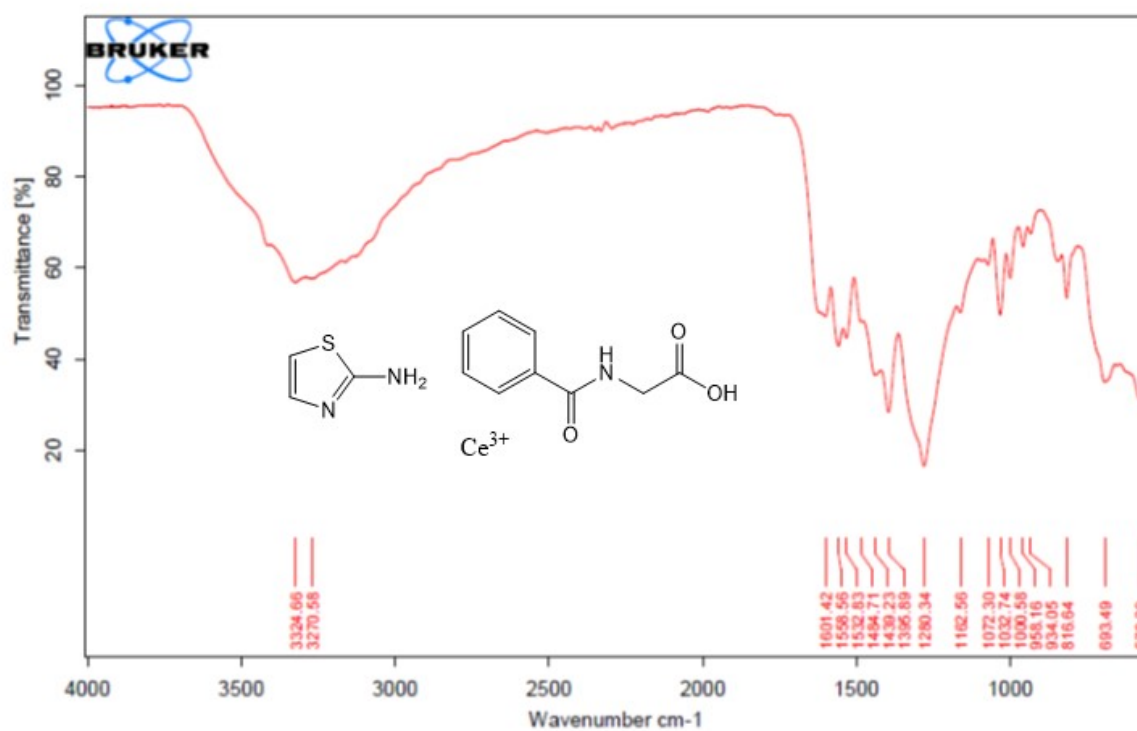

Fig.S16 IR spectra of 1a-Ce.

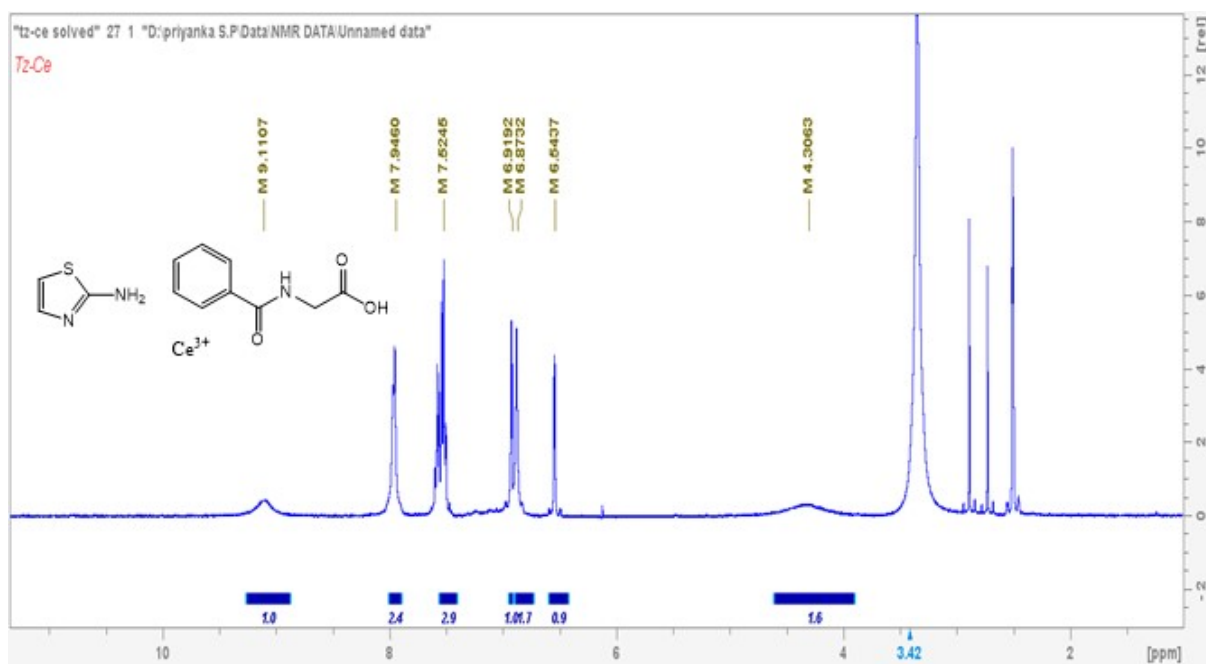

**Fig.S17**  $^1\text{H}$ NMR spectra of compound-1a-Ce.

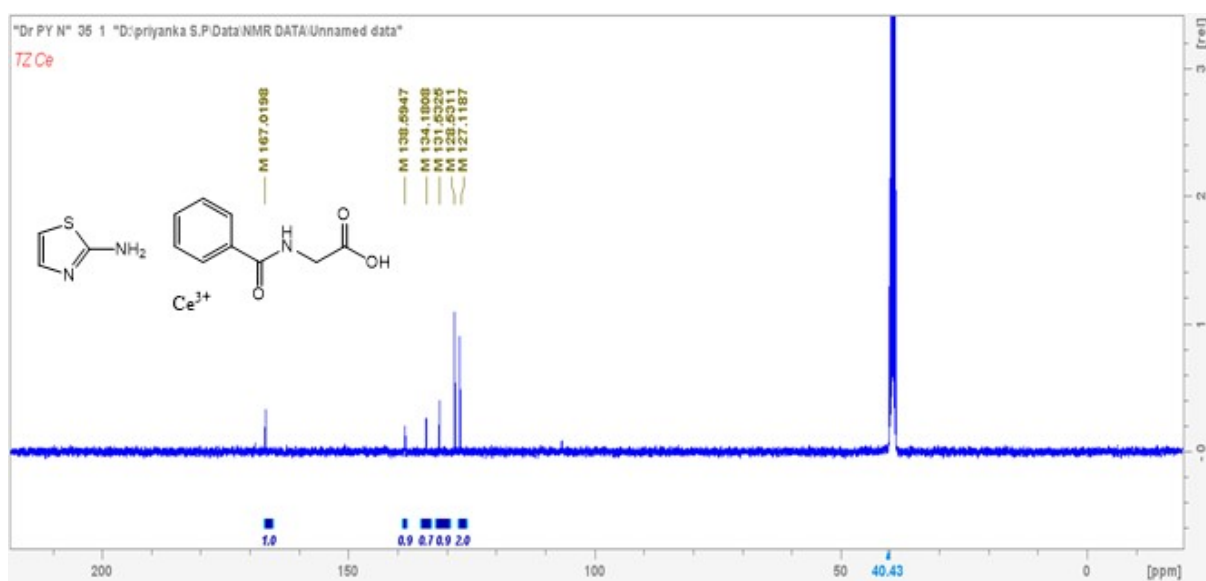

**Fig.S18**  $^{13}\text{C}$  NMR spectra of compound-1a-Ce.

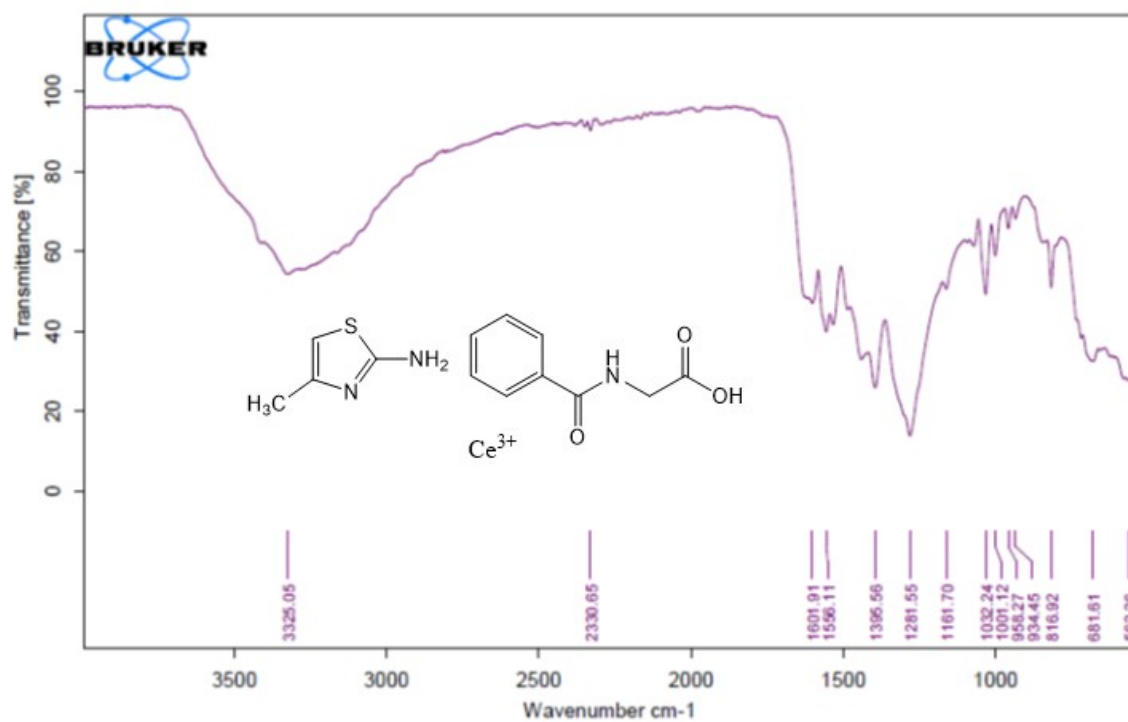

Fig.S19 IR spectra of compound-2a-Ce

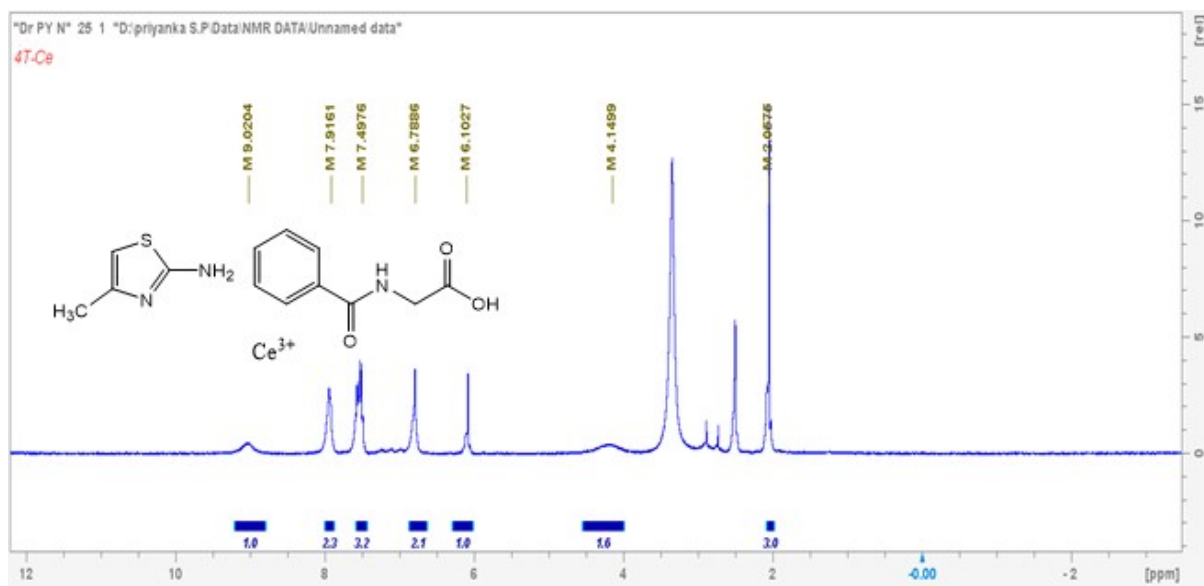

Fig.S20 <sup>1</sup>H NMR spectra of compound-2a-Ce.

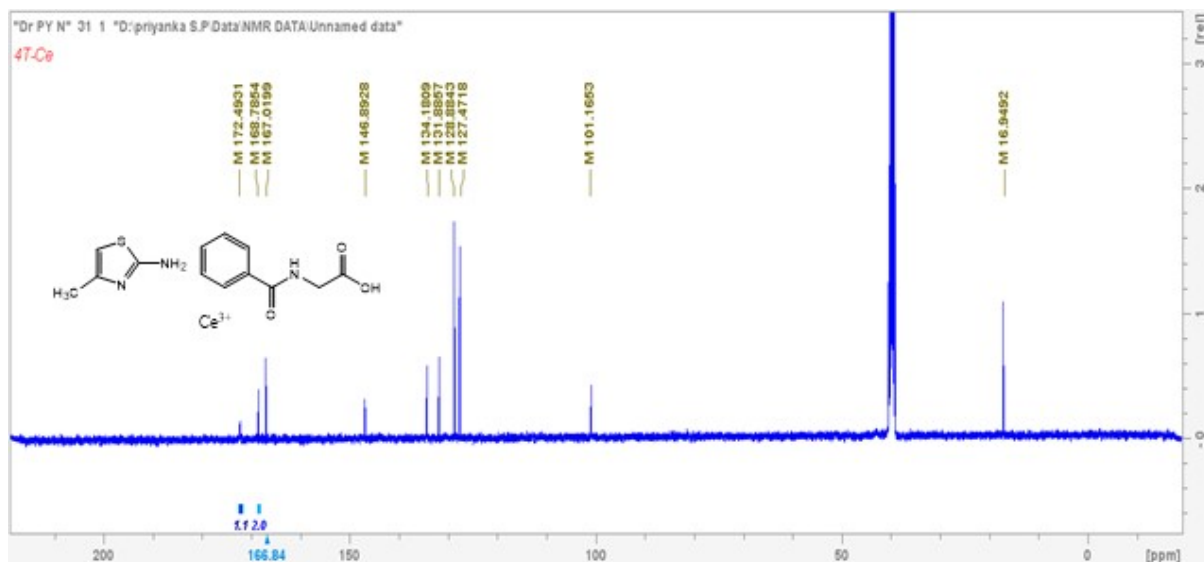

Fig.S21  $^{13}C$ NMR spectra of compound-2a-Ce.

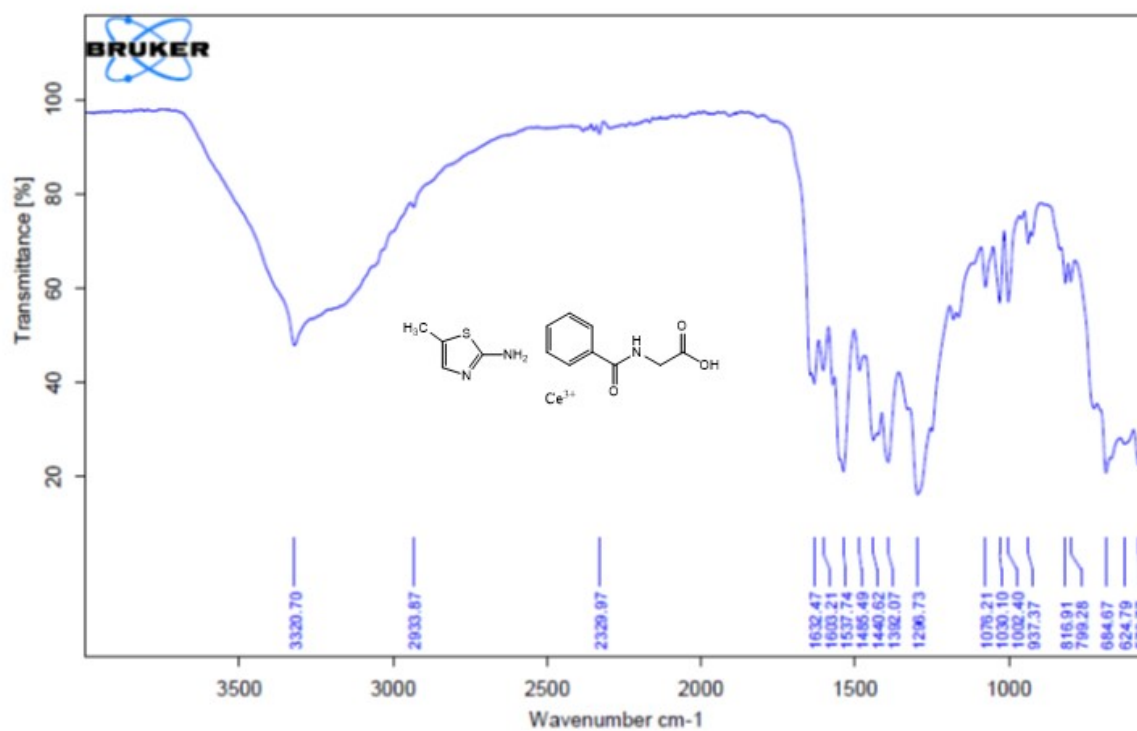

Fig.S22 IR spectra of compound-3a-Ce

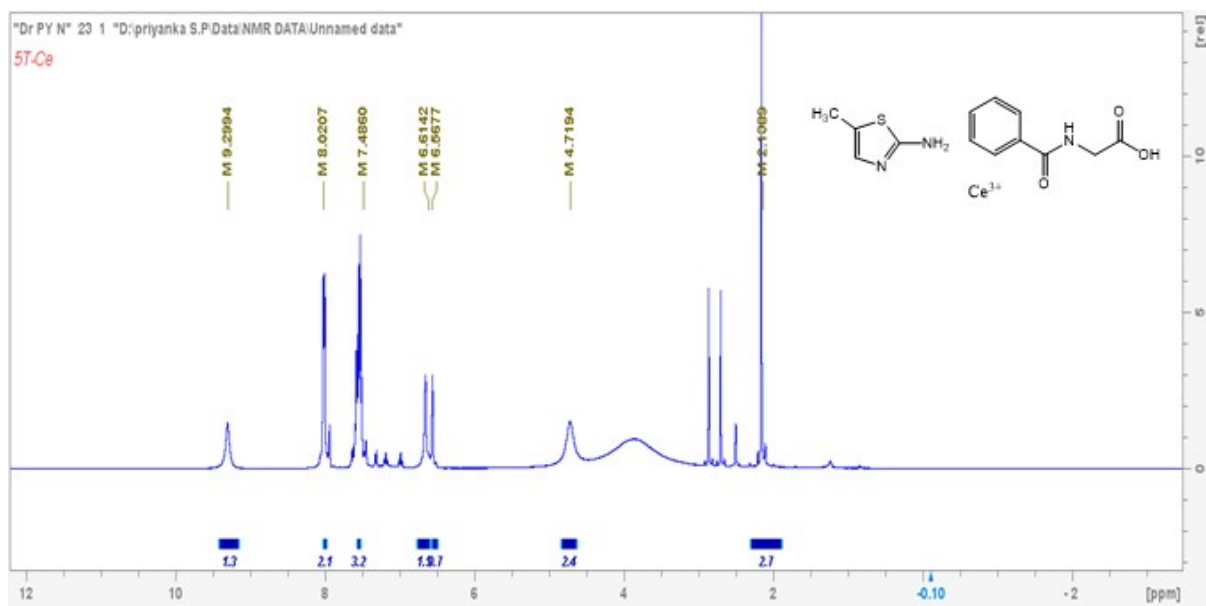

Fig.S23  $^1H$ NMR spectra of compound-3a-Ce

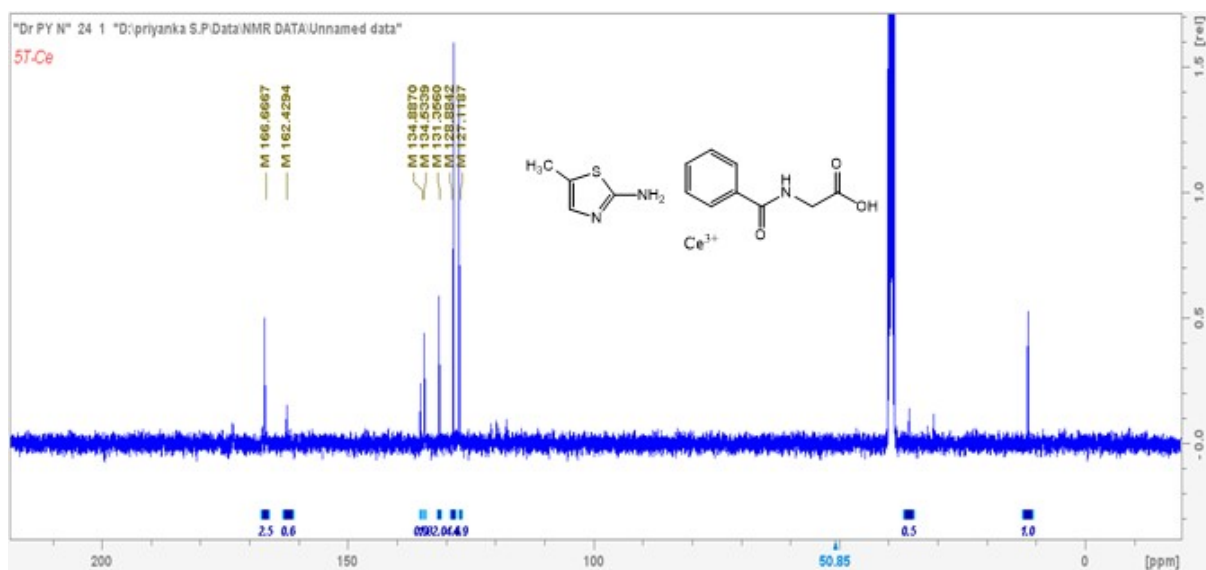

Fig.S24  $^{13}C$ NMR spectra of compound-3a-Ce.

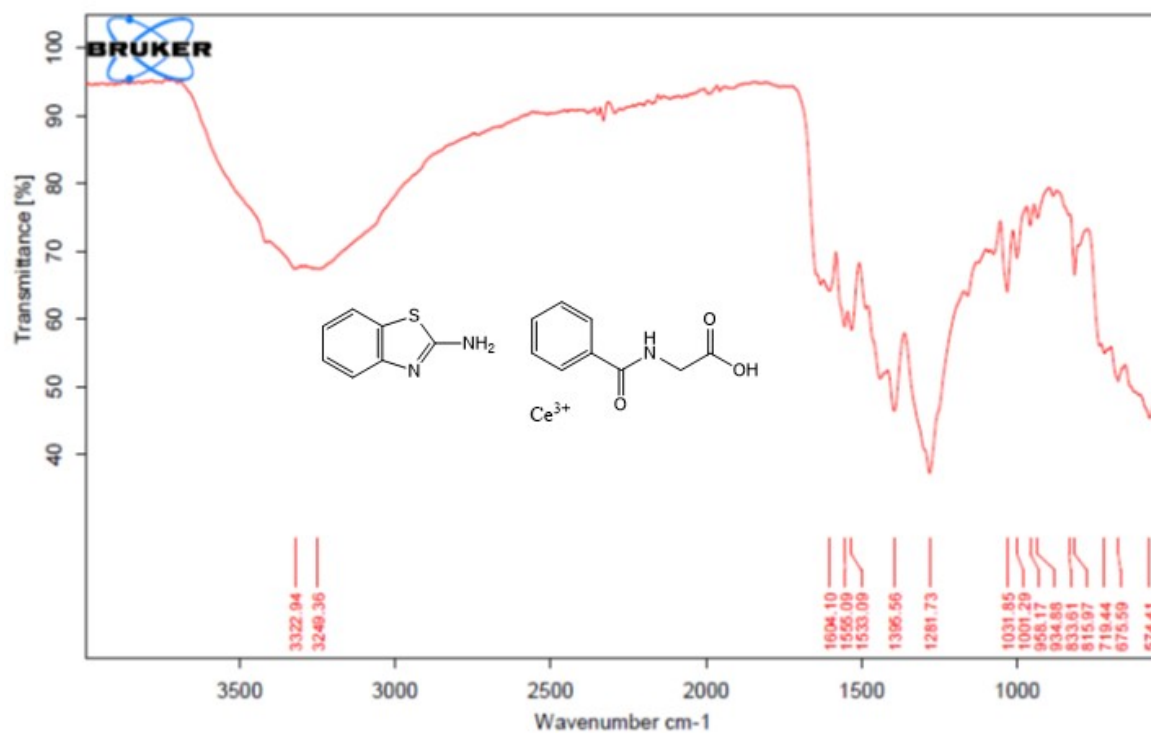

Fig.S25 IR spectra of compound-4a-Ce

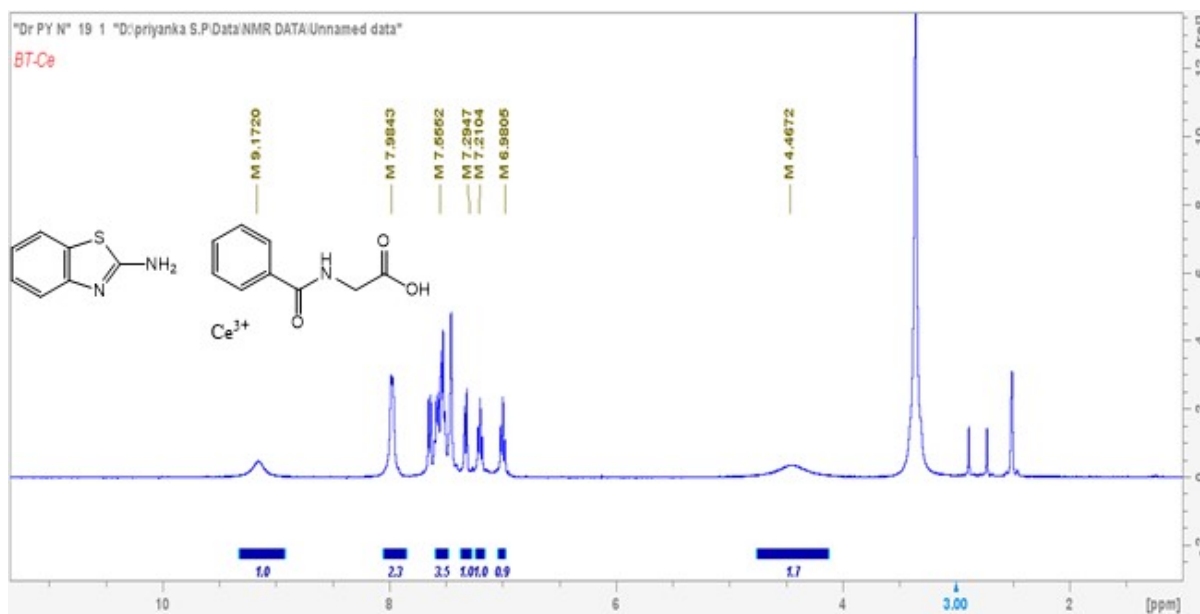

Fig.S26 <sup>1</sup>H NMR spectra of compound-4a-Ce

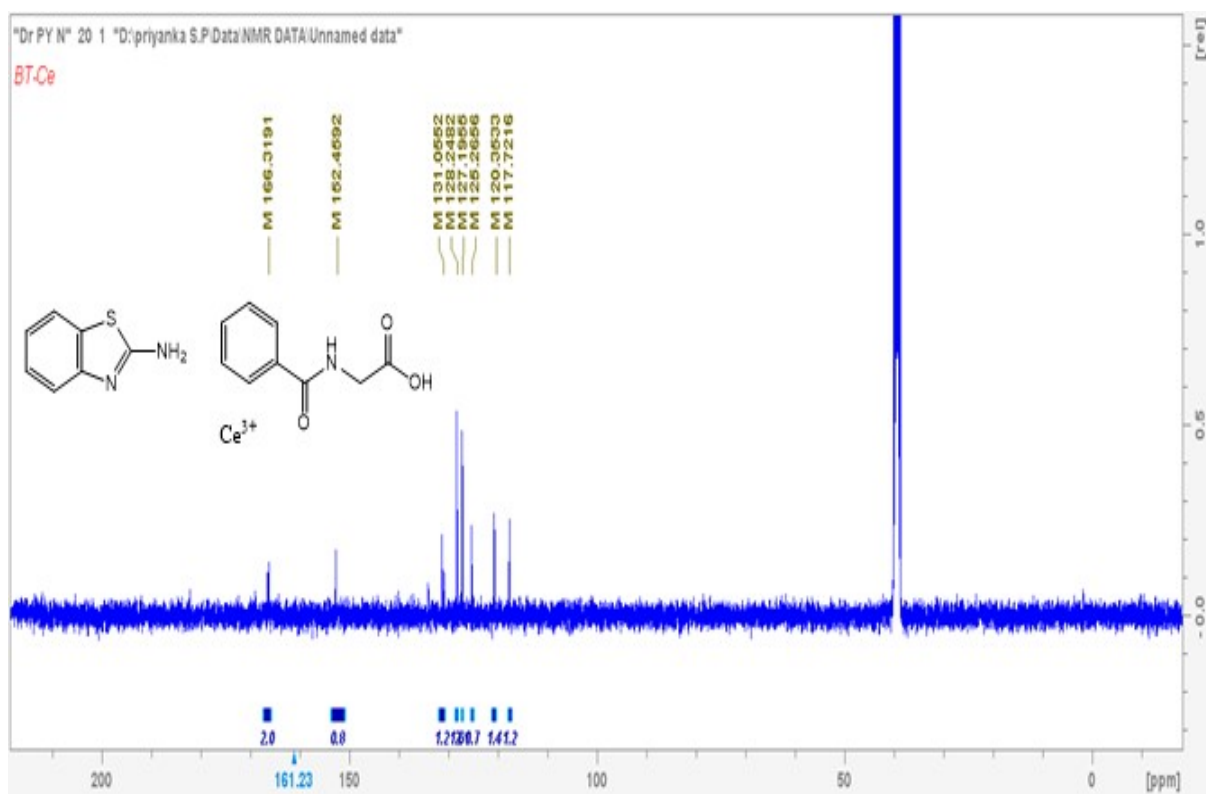

**Fig.S27**  $^{13}\text{C}$ NMR spectra of compound-4a-Ce.

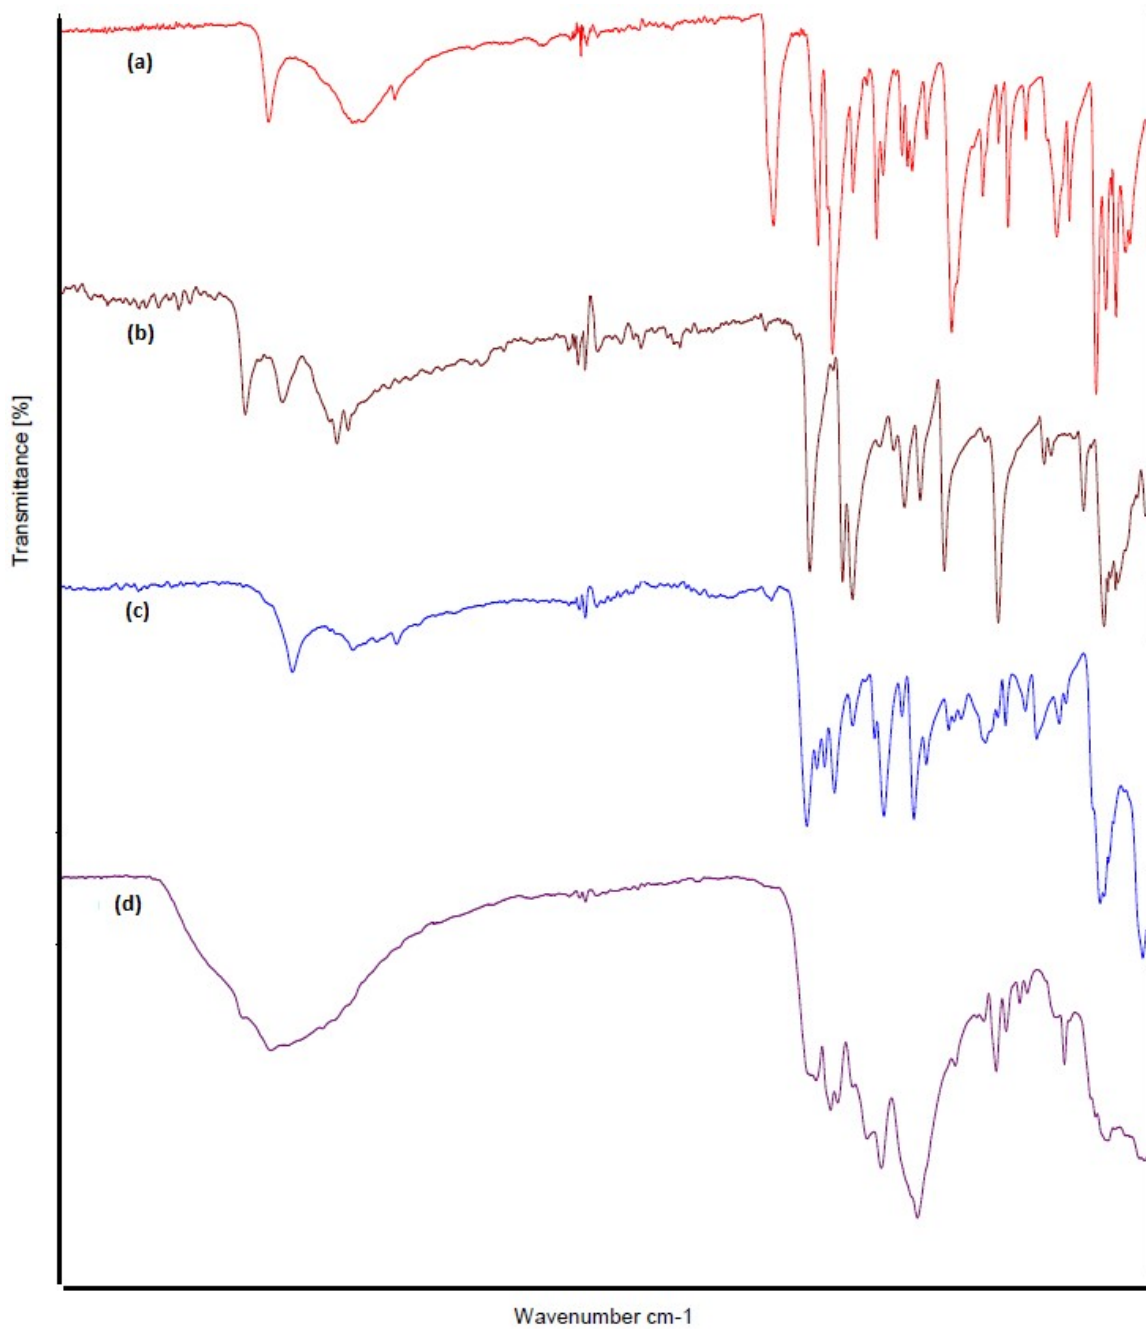

**Fig.S28** Overlapping IR spectra of (a) Compound-a, (b) Compound-2, (c) Compound-2a, and (d) Compound-2a-Ce. The spectra illustrate the progressive changes in vibrational features upon structural modification and Ce<sup>3+</sup> incorporation.

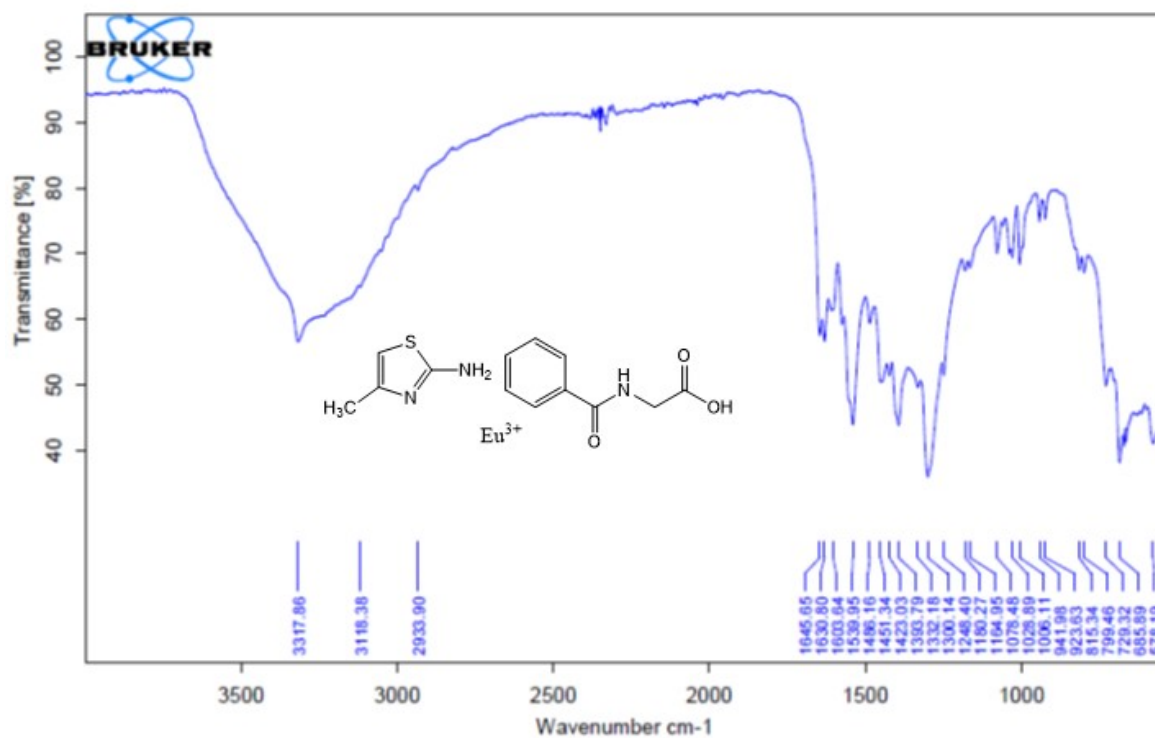

Fig.S29 IR spectra of compound-2a-Eu<sup>3+</sup>

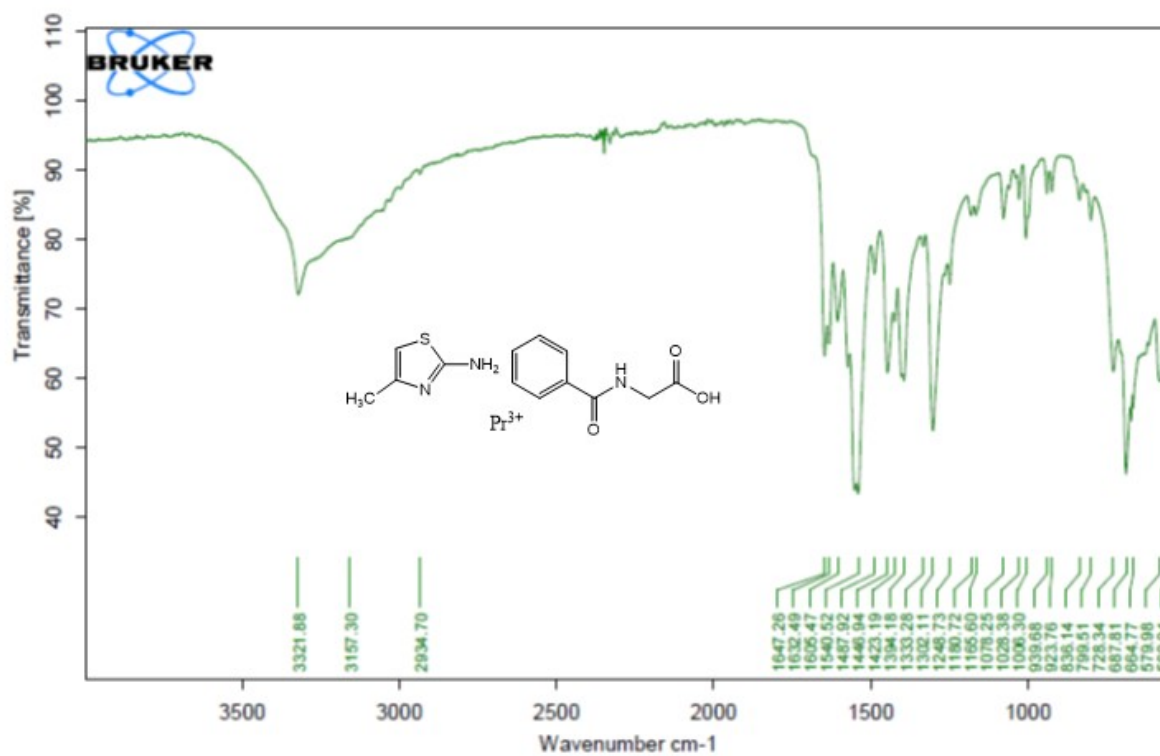

Fig.S30 IR spectra of compound-2a-Pr<sup>3+</sup>

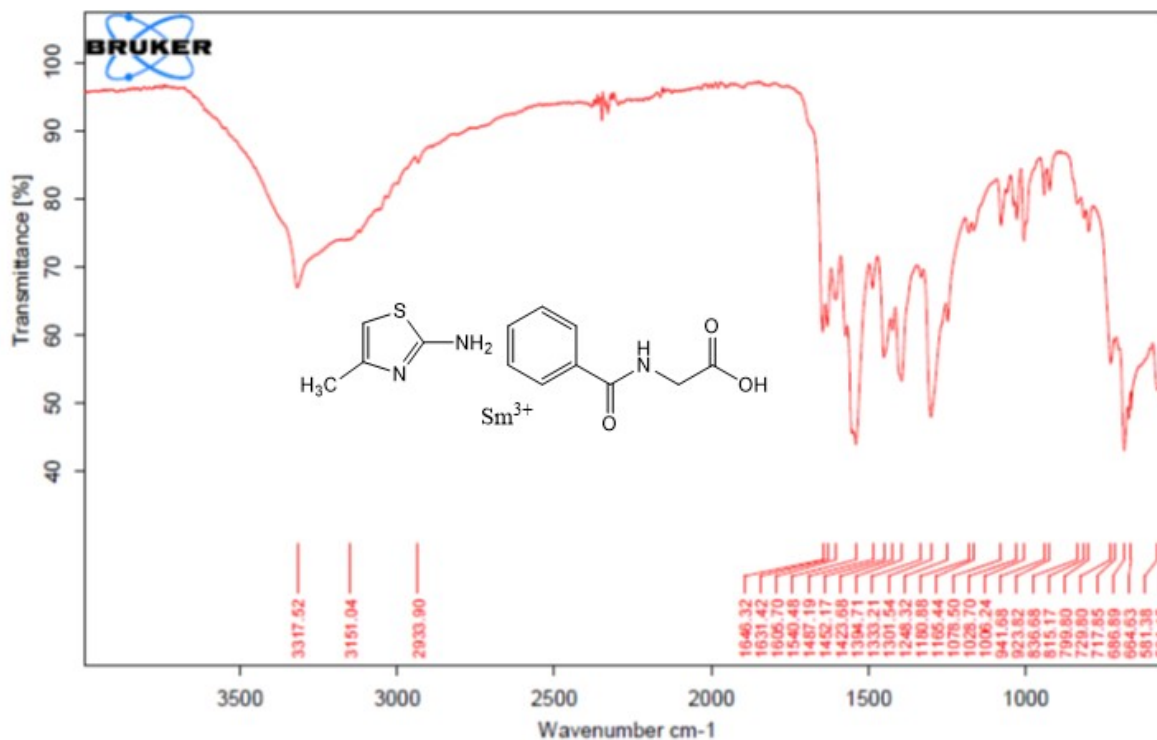

Fig.S31 IR spectra of compound-2a-Sm<sup>3+</sup>

## References

1. Y. Hua, ICP-MS determination of trace Ce(III) in environmental samples, *Anal. Methods*, **2021**, *13*, 4567–4574.
2. Quinoline-based probes for fluorescent and electrochemical sensing of Ce<sup>3+</sup>, *J. Photochem. Photobiol. A: Chem.*, **2020**, *400*, 112706.
3. X. Luo, Spiropyran fluorescent probe for Ce<sup>3+</sup> detection, *J. Rare Earths*, **2020**, *38*, 1234–1242.
4. Bio-inspired nanochannel/membrane for Ce<sup>3+</sup> detection in wastewater, *Chem. Eng. J.*, **2023**, *456*, 132145.
